# Supplementary material for: Pharmacokinetics, Mass Balance, Excretion, and Tissue Distribution of Plasmalogen Precursor PPI-1011
Source: PubMed Central journal article supplement (PMC9081329; doi:10.3389/fcell.2022.867138), 2022-04-25
Supplement: Table1.pdf [file Table1.pdf]

**Supplementary Table S1. Rat IDs, weights and doses administered to rats.**

| Group # | Frontage Rat # | Rat Weight | Target Dose Vol | Syringe + Dose Weight | Empty Syringe Weight | Actual Dose Weight per Rat | Dose Conc. | $\mu\text{Ci/Rat Dosed}$ | $\mu\text{Ci/kg Rat Weight}$ | % Diff from Target Radioactive Dose* |
|---------|----------------|------------|-----------------|-----------------------|----------------------|----------------------------|------------|--------------------------|------------------------------|--------------------------------------|
|         |                | kg         | mL              | g                     | g                    | g                          |            |                          |                              |                                      |
| G1      | 1M             | 0.208      | 1.0             | 4.9316                | 3.9813               | 0.9503                     | 42.62      | 40.50                    | 195                          | -2.64                                |
|         |                | 0.274      | 1.4             | 5.2726                | 3.9697               | 1.3029                     |            | 55.53                    | 203                          | 1.33                                 |
|         | 0.259          | 1.3        | 5.1391          | 3.9058                | 1.2333               | 52.56                      |            | 203                      | 1.48                         |                                      |
|         | 0.280          | 1.4        | 5.3626          | 3.9904                | 1.3722               | 58.48                      |            | 209                      | 4.44                         |                                      |
|         | 5M             | 0.264      | 1.3             | 5.1362                | 3.9142               | 1.2220                     |            | 52.08                    | 197                          | -1.36                                |
|         |                | 0.263      | 1.3             | 5.1790                | 3.9576               | 1.2214                     |            | 52.06                    | 198                          | -1.03                                |
|         | 7M             | 0.236      | 1.2             | 5.0734                | 3.9463               | 1.1271                     |            | 48.04                    | 204                          | 1.78                                 |
|         |                | 0.266      | 1.3             | 5.2233                | 3.9774               | 1.2459                     |            | 53.10                    | 200                          | -0.18                                |

\*The target dose was 200  $\mu\text{Ci/kg}$ .
