# Supplementary material for: Pharmacokinetics, Mass Balance, Excretion, and Tissue Distribution of Plasmalogen Precursor PPI-1011
Source: PubMed Central journal article supplement (PMC9081329; doi:10.3389/fcell.2022.867138), 2022-04-25
Supplement: Table2.pdf [file Table2.pdf]

**Supplementary Table S2.** Recovery of radioactivity (cumulative percent of dose) in excreta of male rates following a single 100 mg/kg oral dose of [<sup>14</sup>C]PPI-1011 (Group 2).

| Group 2: % of Dose |           |       |       |       |              |              |      |
|--------------------|-----------|-------|-------|-------|--------------|--------------|------|
| Matrix             | Time (hr) | 5M    | 6M    | 7M    | 8M           | Mean         | SD   |
| Urine              | 0         | 0.00  | 0.00  | 0.00  | 0.00         | <b>0.00</b>  | 0.00 |
|                    | 0-8       | 0.69  | 0.86  | 0.34  | 0.05         | <b>0.48</b>  | 0.36 |
|                    | 0-24      | 2.04  | 1.73  | 1.33  | 1.09         | <b>1.55</b>  | 0.42 |
|                    | 0-48      | 2.37  | 2.13  | 1.67  | 1.34         | <b>1.88</b>  | 0.46 |
|                    | 0-72      | 2.59  | 2.36  | 1.82  | 1.49         | <b>2.06</b>  | 0.50 |
|                    | 0-96      | 2.72  | 2.51  | 1.91  | 1.57         | <b>2.18</b>  | 0.53 |
|                    | 0-120     | 2.80  | 2.60  | 1.98  | 1.63         | <b>2.26</b>  | 0.54 |
|                    | 0-144     | 2.90  | 2.74  | 2.04  | 1.68         | <b>2.34</b>  | 0.58 |
|                    | 0-168     | 2.96  | 2.82  | 2.08  | 1.73         | <b>2.40</b>  | 0.59 |
| Feces              | 0         | 0.01  | 0.00  | 0.00  | 0.00         | <b>0.00</b>  | 0.00 |
|                    | 0-24      | 47.26 | 27.14 | 33.48 | 30.45        | <b>34.58</b> | 8.84 |
|                    | 0-48      | 49.70 | 30.99 | 43.24 | 38.18        | <b>40.53</b> | 7.91 |
|                    | 0-72      | 50.31 | 33.17 | 44.52 | 39.04        | <b>41.76</b> | 7.35 |
|                    | 0-96      | 50.50 | 33.92 | 45.09 | 39.48        | <b>42.25</b> | 7.14 |
|                    | 0-120     | 50.63 | 34.05 | 45.22 | 39.60        | <b>42.37</b> | 7.14 |
|                    | 0-144     | 50.69 | 34.13 | 45.30 | 39.69        | <b>42.45</b> | 7.14 |
|                    | 0-168     | 50.79 | 34.18 | 45.34 | 39.72        | <b>42.51</b> | 7.16 |
| CO <sub>2</sub>    | 0         | 0.00  | 0.00  |       |              | <b>0.00</b>  | 0.00 |
|                    | 0-24      | 8.47  | 14.28 |       |              | <b>11.37</b> | 4.10 |
| Cage Rinse         | 168       | 0.35  | 0.19  | 0.09  | 0.16         | <b>0.20</b>  | 0.11 |
| Total              | 0         | 0.01  | 0.00  | 0.00  | 0.00         | <b>0.00</b>  | 0.00 |
|                    | 0-24      | 49.30 | 28.87 | 34.81 | 31.54        | <b>36.13</b> | 9.11 |
|                    | 0-48      | 52.08 | 33.12 | 44.90 | 39.53        | <b>42.41</b> | 8.05 |
|                    | 0-72      | 52.90 | 35.52 | 46.33 | 40.53        | <b>43.82</b> | 7.49 |
|                    | 0-96      | 53.22 | 36.43 | 47.00 | 41.05        | <b>44.42</b> | 7.29 |
|                    | 0-120     | 53.43 | 36.66 | 47.20 | 41.23        | <b>44.63</b> | 7.28 |
|                    | 0-144     | 53.60 | 36.87 | 47.33 | 41.37        | <b>44.79</b> | 7.27 |
|                    | 0-168*    | 54.10 | 37.19 | 47.51 | 41.61        | <b>45.10</b> | 7.34 |
| 0-168**            | 62.57     | 51.47 |       |       | <b>57.02</b> | 7.85         |      |

\*Total at 0-168 hr included urine, feces and cage rinse.

\*\* Total at 0-168 hr included urine, feces, cage rinse, and expired air (<sup>14</sup>C-CO<sub>2</sub> for Rat #5M and 6M only; expired air (<sup>14</sup>C-CO<sub>2</sub>) were not collected for Rat #7M and 8M.
